# Supplementary material for: Mechanistic insights into the chemistry of compound I formation in heme peroxidases: quantum chemical investigations of cytochromecperoxidase
Source: Royal Society of Chemistry journal article supplement (doi:10.1039/d2ra01073a), 2022-01-01
Supplement: d2ra01073a1.pdf [file d2ra01073a1.pdf]

# Mechanistic insights into the chemistry of compound I formation in heme peroxidases: Quantum Chemical investigations of cytochrome c peroxidase

## SUPPLEMENTARY INFORMATION:

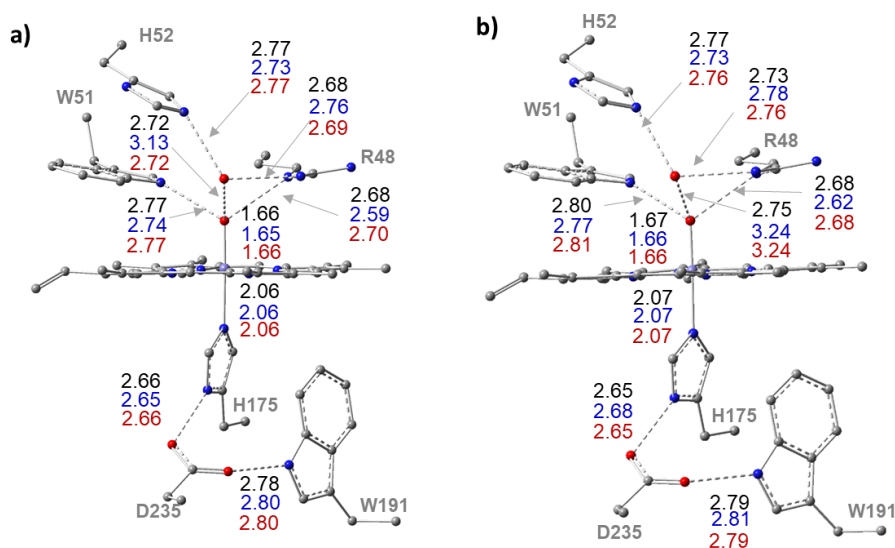

**Figure S1:** Cluster structures of Cpd I complexes, with selected distances between heavy atoms (Å), for three different spin states: doublet (black), quartet (blue) and sextet (red); geometries optimized with a) UB3LYP-D3BJ/6-31G(d,p) and b) UB3LYP-D3BJ/6-31+G(d,p).

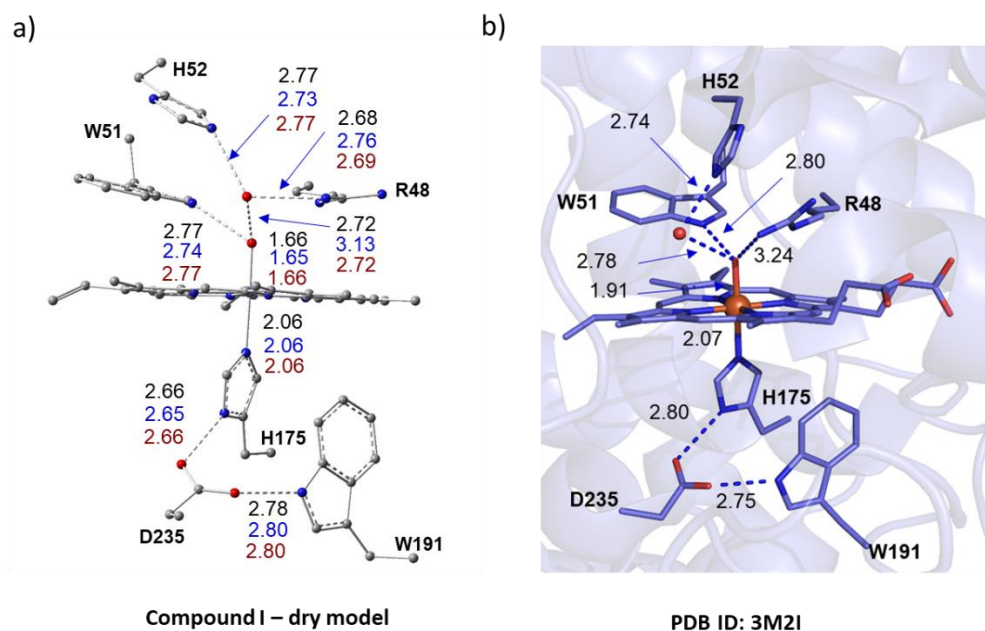

**Figure S2:** Cluster structures of Cpd I complexes, with selected distances between heavy atoms (Å), for a) three different spin states: doublet (black), quartet (blue) and sextet (red); b) the heme pocket of crystallized ferryl-intermediate CcpI.

**Table S1:** Gibbs Free-energy (kcal/mol) for both the wet and dry mechanisms of Cpd I formation for three different spin states: Free energies are estimated with B3LYP-GD3BJ/6-311+G(2d,2p)+ΔG with  $\epsilon=4$ .

|            | Wet-mechanism |         |        | Dry-Mechanism |         |        |
|------------|---------------|---------|--------|---------------|---------|--------|
|            | Doublet       | Quartet | Sextet | Doublet       | Quartet | Sextet |
| <b>RC</b>  | 0.0           | 0.0     | 0.0    | 0.0           | 0.0     | 0.0    |
| <b>TS1</b> | 1.0           | 16.6    | 2.1    | 3.0           | 0.7     | 0.0    |
| <b>IC1</b> | 8.5           | 18.3    | 6.8    | -5.8          | 0.7     | 1.0    |
| <b>IC2</b> | 1.4           | 18.6    | 9.0    | -2.8          | 14.6    | 2.8    |
| <b>TS2</b> | 11.8          | 25.0    | 10.5   | 7.6           | 31.1    | 25.6   |
| <b>PC</b>  | -18.5         | -17.8   | -9.7   | -28.4         | -21.9   | -14.8  |

**Table S2:** Relative-energy (kcal/mol) for both the wet and dry mechanisms of Cpd I formation for three different spin states: Free energies are estimated with UB3LYP-GD3BJ/6-311+G(2d,2p) with  $\epsilon=4$ .

|            | Wet-mechanism |         |        | Dry-Mechanism |         |        |
|------------|---------------|---------|--------|---------------|---------|--------|
|            | Doublet       | Quartet | Sextet | Doublet       | Quartet | Sextet |
| <b>RC</b>  | 0.0           | 0.0     | 0.0    | 0.0           | 0.0     | 0.0    |
| <b>TS1</b> | 1.8           | 19.5    | 4.1    | 3.9           | 1.1     | 1.0    |
| <b>IC1</b> | 5.4           | 13.4    | -2.0   | -1.7          | 1.0     | 0.2    |
| <b>IC2</b> | -4.4          | 11.9    | -2.5   | -8.7          | 11.6    | 0.7    |
| <b>TS2</b> | 8.4           | 20.4    | 42.7   | 7.7           | 30.6    | 27.4   |
| <b>PC</b>  | -16.9         | -21.5   | -13.4  | -26.6         | -20.5   | -14.6  |

**Table S3:** Relative-energy (kcal/mol) for the dry mechanisms of Cpd I formation in doublet spin states: Electronic and Free energies are estimated with BS1 (UB3LYP-GD3BJ/6-311+G(2d,2p) with  $\epsilon=4$ ) and BS2 (UB3LYP-GD3BJ/6-311+G(2df,2p)).

|            | BS1        |       | BS2        |       |
|------------|------------|-------|------------|-------|
|            | Electronic | Gibbs | Electronic | Gibbs |
| <b>RC</b>  | 0.0        | 0.0   | 0.0        | 0.0   |
| <b>TS1</b> | 3.9        | 3.0   | 3.9        | 3.0   |
| <b>IC</b>  | -1.7       | -0.3  | -1.7       | -0.4  |
| <b>IC2</b> | -8.7       | -2.8  | -8.7       | -2.7  |
| <b>TS2</b> | 7.7        | 7.7   | 8.0        | 8.0   |
| <b>PC</b>  | -26.6      | -28.4 | -26.5      | -28.3 |

**Table S4:** Relative Free-energy (kcal/mol) for both cpd0 and Cpd I calculated in three different spin states estimated with UB3LYP-GD3BJ/6-311+G(2d,2p) in four different dielectric constants.

|                   | Cpd 0   |         |        | Cpd I   |         |        |
|-------------------|---------|---------|--------|---------|---------|--------|
|                   | Doublet | Quartet | Sextet | Doublet | Quartet | Sextet |
| $\epsilon = 4$    | 1.3     | 0.0     | 5.1    | 0.0     | 5.3     | 13.8   |
| $\epsilon = 8$    | 2.7     | 0.0     | 7.3    | 0.0     | 9.9     | 14.5   |
| $\epsilon = 16$   | 0.0     | 15.6    | 3.7    | 0.0     | 9.0     | 13.8   |
| $\epsilon = 78.4$ | 0.0     | 16.2    | 3.0    | 0.0     | 2.5     | 13.5   |

**Table S5:** Selected distances between heavy atoms (Å) obtained for Cpd 0, for three different spin states: doublet (black), quartet (blue) and sextet (red). Geometries are optimized with UB3LYP-D3BJ/6-31G(d,p).

|                   | Fe-O1 | 1O <sup>'''</sup> 1N <sub>R48</sub> | 2O <sup>'''</sup> 2N <sub>R48</sub> | 1O <sup>'''</sup> N <sub>W51</sub> | 1O <sup>'''</sup> O2 | 2O <sup>'''</sup> N <sub>H52</sub> | Fe-N2 <sub>H175</sub> | H175 N2 <sup>'''</sup> O <sub>D235</sub> | W191 N <sup>'''</sup> O <sub>D235</sub> |
|-------------------|-------|-------------------------------------|-------------------------------------|------------------------------------|----------------------|------------------------------------|-----------------------|------------------------------------------|-----------------------------------------|
| $\epsilon = 1$    | 1.97  | 2.65                                | 2.87                                | 2.76                               | 1.83                 | 2.74                               | 1.88                  | 2.68                                     | 2.86                                    |
|                   | 1.97  | 2.67                                | 2.88                                | 2.77                               | 1.76                 | 2.76                               | 1.89                  | 2.67                                     | 2.86                                    |
|                   | 2.31  | 2.59                                | 2.90                                | 2.73                               | 1.74                 | 2.72                               | 1.98                  | 2.66                                     | 2.87                                    |
| $\epsilon = 4$    | 1.93  | 2.72                                | 2.87                                | 2.77                               | 1.48                 | 2.78                               | 1.91                  | 2.62                                     | 2.85                                    |
|                   | 2.31  | 2.62                                | 2.93                                | 2.72                               | 1.48                 | 2.78                               | 2.08                  | 2.60                                     | 2.85                                    |
|                   | 2.22  | 2.66                                | 2.88                                | 2.72                               | 1.47                 | 2.75                               | 2.03                  | 2.60                                     | 2.86                                    |
| $\epsilon = 8$    | 1.92  | 2.73                                | 2.87                                | 2.77                               | 1.48                 | 2.87                               | 1.92                  | 2.61                                     | 2.86                                    |
|                   | 1.92  | 2.73                                | 2.87                                | 2.77                               | 1.48                 | 2.79                               | 1.92                  | 2.61                                     | 2.86                                    |
|                   | 2.21  | 2.72                                | 2.88                                | 2.66                               | 1.47                 | 2.76                               | 2.03                  | 2.60                                     | 2.86                                    |
| $\epsilon = 16$   | 1.92  | 2.75                                | 2.87                                | 2.77                               | 1.48                 | 2.81                               | 1.92                  | 2.61                                     | 2.86                                    |
|                   | 1.93  | 2.75                                | 2.88                                | 2.78                               | 1.47                 | 2.82                               | 1.93                  | 2.61                                     | 2.86                                    |
|                   | 2.21  | 2.67                                | 2.88                                | 2.72                               | 1.47                 | 2.76                               | 2.04                  | 2.60                                     | 2.85                                    |
| $\epsilon = 78.4$ | 1.91  | 2.76                                | 2.86                                | 2.77                               | 1.47                 | 2.81                               | 1.93                  | 2.60                                     | 2.86                                    |
|                   | 1.92  | 2.76                                | 2.88                                | 2.78                               | 1.47                 | 2.82                               | 1.94                  | 2.61                                     | 2.86                                    |
|                   | 2.19  | 2.68                                | 2.89                                | 2.73                               | 1.47                 | 2.76                               | 2.05                  | 2.58                                     | 2.84                                    |

**Table S6:** Selected distances between heavy atoms (Å) obtained for Cpd I, for three different spin states: doublet (black), quartet (blue) and sextet (red). Geometries are optimized with UB3LYP-D3BJ/6-31G(d,p).

|                | Fe-O1 | 1O <sup>'''</sup> 1N <sub>R48</sub> | 2O <sup>'''</sup> 2N <sub>R48</sub> | 1O <sup>'''</sup> N <sub>W51</sub> | 1O <sup>'''</sup> O2 | 2O <sup>'''</sup> N <sub>H52</sub> | Fe-N2 <sub>H175</sub> | H175 N2 <sup>'''</sup> O <sub>D235</sub> | W191 N <sup>'''</sup> O <sub>D235</sub> |
|----------------|-------|-------------------------------------|-------------------------------------|------------------------------------|----------------------|------------------------------------|-----------------------|------------------------------------------|-----------------------------------------|
| <b>ε =1</b>    | 1.97  | 2.65                                | 2.87                                | 2.76                               | 1.83                 | 2.74                               | 1.88                  | 2.68                                     | 2.86                                    |
|                | 1.97  | 2.67                                | 2.88                                | 2.77                               | 1.76                 | 2.76                               | 1.89                  | 2.67                                     | 2.86                                    |
|                | 2.31  | 2.59                                | 2.90                                | 2.73                               | 1.74                 | 2.72                               | 1.98                  | 2.66                                     | 2.87                                    |
| <b>ε =4</b>    | 1.93  | 2.72                                | 2.87                                | 2.77                               | 1.48                 | 2.78                               | 1.91                  | 2.62                                     | 2.85                                    |
|                | 2.31  | 2.62                                | 2.93                                | 2.72                               | 1.48                 | 2.78                               | 2.08                  | 2.60                                     | 2.85                                    |
|                | 2.22  | 2.66                                | 2.88                                | 2.72                               | 1.47                 | 2.75                               | 2.03                  | 2.60                                     | 2.86                                    |
| <b>ε =8</b>    | 1.92  | 2.73                                | 2.87                                | 2.77                               | 1.48                 | 2.87                               | 1.92                  | 2.61                                     | 2.86                                    |
|                | 1.92  | 2.73                                | 2.87                                | 2.77                               | 1.48                 | 2.79                               | 1.92                  | 2.61                                     | 2.86                                    |
|                | 2.21  | 2.72                                | 2.88                                | 2.66                               | 1.47                 | 2.76                               | 2.03                  | 2.60                                     | 2.86                                    |
| <b>ε =16</b>   | 1.92  | 2.75                                | 2.87                                | 2.77                               | 1.48                 | 2.81                               | 1.92                  | 2.61                                     | 2.86                                    |
|                | 1.93  | 2.75                                | 2.88                                | 2.78                               | 1.47                 | 2.82                               | 1.93                  | 2.61                                     | 2.86                                    |
|                | 2.21  | 2.67                                | 2.88                                | 2.72                               | 1.47                 | 2.76                               | 2.04                  | 2.60                                     | 2.85                                    |
| <b>ε =78.4</b> | 1.91  | 2.76                                | 2.86                                | 2.77                               | 1.47                 | 2.81                               | 1.93                  | 2.60                                     | 2.86                                    |
|                | 1.92  | 2.76                                | 2.88                                | 2.78                               | 1.47                 | 2.82                               | 1.94                  | 2.61                                     | 2.86                                    |
|                | 2.19  | 2.68                                | 2.89                                | 2.73                               | 1.47                 | 2.76                               | 2.05                  | 2.58                                     | 2.84                                    |

**Table S7:** Selected distances between heavy atoms (Å) obtained for the structures of cpd0 (IC2), for WT Ccp1 and the explored in-silico generated variants. Geometries are optimized with UB3LYP-D3BJ/6-31G(d,p).

|                        | Fe-O1 | 1O <sup>'''</sup> 1N <sub>R48</sub> | 2O <sup>'''</sup> 2N <sub>R48</sub> | 1O <sup>'''</sup> N <sub>W51</sub> | 1O <sup>'''</sup> O2 | 2O <sup>'''</sup> N <sub>H52</sub> | Fe-N2 <sub>H175</sub> | H175 N2 <sup>'''</sup> O <sub>D235</sub> | W191 N <sup>'''</sup> O <sub>D235</sub> |
|------------------------|-------|-------------------------------------|-------------------------------------|------------------------------------|----------------------|------------------------------------|-----------------------|------------------------------------------|-----------------------------------------|
| <b>WT</b>              | 1.99  | 2.76                                | 2.81                                | --                                 | 1.48                 | 2.69                               | 1.90                  | 2.70                                     | 2.85                                    |
| <b>W51A</b>            | 1.97  | 2.74                                | 2.85                                |                                    | 1.48                 | 2.55                               | 1.91                  | 2.72                                     | 2.86                                    |
| <b>R48A</b>            | 1.93  | --                                  | --                                  | 2.81                               | 1.47                 | 2.70                               | 2.09                  | 2.57                                     | 2.84                                    |
| <b>W51F/<br/>W191F</b> | 2.00  | 2.71                                | 2.85                                | --                                 | 1.48                 | 2.71                               | 1.90                  | 2.69                                     | --                                      |
| <b>W191Y</b>           | 2.01  | 2.76                                | 2.82                                | --                                 | 1.48                 | 2.91                               | 1.89                  | 2.63                                     | 2.75                                    |
| <b>W191A</b>           | 1.97  | 2.74                                | 2.85                                | --                                 | 1.48                 | 2.87                               | 1.88                  | 2.70                                     | --                                      |
| <b>D235H</b>           | 1.92  | 2.79                                | 2.82                                | --                                 | 1.48                 | 2.84                               | 1.95                  | 2.82                                     | --                                      |
| <b>D235N</b>           | 1.95  | 2.76                                | 2.84                                | --                                 | 1.48                 | 3.01                               | 1.93                  | 2.74                                     | --                                      |
| <b>D235E</b>           | 1.97  | 2.77                                | 2.83                                | --                                 | 1.48                 | 2.81                               | 1.92                  | 2.62 (O1)                                | 2.72 (O1)                               |
| <b>D235A</b>           | 1.90  | 2.81                                | 2.85                                | --                                 | 1.47                 | 2.69                               | 1.95                  | --                                       | --                                      |

**Table S8:** Selected distances between heavy atoms (Å) obtained for the structures of cpd0 (IC2), for WT Ccp1 and the explored variants Geometries are optimized with UB3LYP-D3BJ/6-31G(d,p).

|                        | Fe-O1 | 1O <sup>'''</sup> 1N <sub>R48</sub> | 2O <sup>'''</sup> 2N <sub>R48</sub> | 1O <sup>'''</sup> N <sub>W51</sub> | 1O <sup>'''</sup> O2 | 2O <sup>'''</sup> N <sub>H52</sub> | Fe <sup>'''</sup> N2 <sub>H175</sub> | H175 N2 <sup>'''</sup> O <sub>D235</sub> | W191 N <sup>'''</sup> O <sub>D235</sub> |
|------------------------|-------|-------------------------------------|-------------------------------------|------------------------------------|----------------------|------------------------------------|--------------------------------------|------------------------------------------|-----------------------------------------|
| <b>WT</b>              | 1.97  | 2.65                                | 2.87                                | 2.76                               | 1.48                 | 2.74                               | 1.88                                 | 2.68                                     | 2.86                                    |
| <b>W51A</b>            | 1.95  | 2.69                                | 2.88                                | --                                 | 1.49                 | 2.61                               | 1.91                                 | 2.70                                     | 2.85                                    |
| <b>R48A</b>            | 1.90  | --                                  | --                                  | 2.76                               | 1.48                 | 2.65                               | 1.93                                 | 2.62                                     | 2.83                                    |
| <b>W51F/<br/>W191F</b> | 1.95  | 2.60                                | 2.91                                | 2.71                               | 1.48                 | 2.71                               | 1.89                                 | 2.66                                     | --                                      |
| <b>W191Y</b>           | 1.97  | 2.65                                | 2.90                                | 2.76                               | 1.48                 | 2.76                               | 1.88                                 | 2.61                                     | 2.74                                    |
| <b>W191A</b>           | 1.96  | 2.63                                | 2.87                                | 2.77                               | 1.50                 | 2.73                               | 1.88                                 | 2.71                                     | --                                      |
| <b>D235H</b>           | 1.91  | 2.70                                | 2.94                                | 2.79                               | 1.48                 | 2.87                               | 1.94                                 | 2.82                                     | --                                      |
| <b>D235N</b>           | 1.91  | 2.68                                | 2.91                                | 2.79                               | 1.48                 | 2.80                               | 1.93                                 | 2.74                                     | --                                      |
| <b>D235E</b>           | 1.94  | 2.66                                | 2.90                                | 2.76                               | 1.48                 | 2.75                               | 1.91                                 | 2.64                                     | --                                      |
| <b>D235A</b>           | 1.91  | 2.70                                | 2.94                                | 2.81                               | 1.48                 | 2.88                               | 1.95                                 | --                                       | --                                      |

**Table S9:** Selected distances between heavy atoms (Å) obtained for the structures of TS2, for WT Ccp1 and the explored variants Geometries are optimized with UB3LYP-D3BJ/6-31G(d,p).

|                        | Fe-O1 | 1O <sup>'''</sup> 1N <sub>R48</sub> | 2O <sup>'''</sup> 2N <sub>R48</sub> | 1O <sup>'''</sup> N <sub>W51</sub> | 1O <sup>'''</sup> O2 | 2O <sup>'''</sup> N <sub>H52</sub> | Fe-N2 <sub>H175</sub> | H175 N2 <sup>'''</sup> O <sub>D235</sub> | W191 N <sup>'''</sup> O <sub>D235</sub> |
|------------------------|-------|-------------------------------------|-------------------------------------|------------------------------------|----------------------|------------------------------------|-----------------------|------------------------------------------|-----------------------------------------|
| <b>WT</b>              | 2.77  | 2.67                                | 2.77                                | 2.77                               | 1.83                 | 2.53                               | 1.92                  | 2.70                                     | 2.85                                    |
| <b>W51A</b>            | 1.74  | 2.72                                | 2.78                                | --                                 | 1.83                 | 2.52                               | 1.94                  | 2.71                                     | 2.85                                    |
| <b>R48A</b>            | 1.76  | --                                  | --                                  | 2.82                               | 1.74                 | 2.55                               | 1.93                  | 2.59                                     | 2.90                                    |
| <b>W51F/<br/>W191F</b> | 1.74  | 2.62                                | 2.79                                | 2.59                               | 1.84                 | 2.59                               | 1.92                  | 2.68                                     | --                                      |
| <b>W191Y</b>           | 1.77  | 2.66                                | 2.78                                | 2.77                               | 1.81                 | 2.77                               | 1.91                  | 2.63                                     | 2.71                                    |
| <b>W191A</b>           | 1.77  | 2.69                                | 2.75                                | 2.85                               | 1.82                 | 2.59                               | 1.91                  | 2.72                                     | --                                      |
| <b>D235H</b>           | 1.71  | 2.71                                | 2.82                                | 2.80                               | 1.86                 | 2.80                               | 1.99                  | 2.83                                     | --                                      |
| <b>D235N</b>           | 1.71  | 2.71                                | 2.83                                | 2.79                               | 1.86                 | 2.70                               | 1.99                  | 2.74                                     | --                                      |
| <b>D235E</b>           | 1.74  | 2.79                                | 2.67                                | 2.77                               | 1.84                 | 2.63                               | 1.95                  | 2.62                                     | 2.74(N1)                                |
| <b>D235A</b>           | 1.71  | 2.72                                | 2.82                                | 2.82                               | 1.86                 | 2.71                               | 2.00                  | --                                       | --                                      |

**Table S10:** Selected distances between heavy atoms (Å) obtained for Cpd I, for WT CcpI and the explored variants. Geometries are optimized with UB3LYP-D3BJ/6-31G(d,p).

|              | Fe-O1 | 1O <sup>'''</sup> 1N <sub>R48</sub> | 2O <sup>'''</sup> 2N <sub>R48</sub> | 1O <sup>'''</sup> N <sub>W51</sub> | 1O <sup>'''</sup> O2 | 2O <sup>'''</sup> N <sub>H52</sub> | Fe-N2 <sub>H175</sub> | H175 N2 <sup>'''</sup> O <sub>D235</sub> | W191 N <sup>'''</sup> O <sub>D235</sub> |
|--------------|-------|-------------------------------------|-------------------------------------|------------------------------------|----------------------|------------------------------------|-----------------------|------------------------------------------|-----------------------------------------|
| <b>WT</b>    | 1.66  | 2.68                                | 2.68                                | 2.77                               | 2.72                 | 2.77                               | 2.06                  | 2.66                                     | 2.78                                    |
| <b>W51A</b>  | 1.65  | 2.70                                | 2.66                                | --                                 | 2.74                 | 2.76                               | 2.09                  | 2.67                                     | 2.85                                    |
| <b>R48A</b>  | 1.70  | --                                  | --                                  | 2.81                               | 2.29                 | 2.78                               | 1.97                  | 2.60                                     | 2.92                                    |
| <b>W51F/</b> |       |                                     |                                     |                                    |                      |                                    |                       |                                          |                                         |
| <b>W191F</b> | 1.64  | 2.67                                | 2.69                                |                                    | 2.68                 | 2.82                               | 2.09                  | 2.80                                     | --                                      |
| <b>W191Y</b> | 1.66  | 2.66                                | 2.72                                | 2.80                               | 2.70                 | 2.81                               | 2.06                  | 2.71                                     | 2.71                                    |
| <b>W191A</b> | 1.67  | 2.71                                | 2.66                                | 2.79                               | 2.72                 | 2.74                               | 2.06                  | 2.80                                     | --                                      |
| <b>D235H</b> | 1.67  | 2.74                                | 2.70                                | 2.66                               | 2.73                 | 2.75                               | 2.05                  | 2.86                                     | --                                      |
| <b>D235N</b> | 1.67  | 2.74                                | 2.70                                | 2.66                               | 2.73                 | 2.75                               | 2.05                  | 2.77                                     | --                                      |
| <b>D235E</b> | 1.67  | 2.66                                | 2.71                                | 2.72                               | 2.70                 | 2.82                               | 2.03                  | 2.65                                     | 2.59 (N1)                               |
| <b>D235A</b> | 1.67  | 2.74                                | 2.69                                | 2.67                               | 2.73                 | 2.75                               | 2.06                  | --                                       | --                                      |

**Table S11:** Spin density sum Values for the major spin contaminated components of Cpd I obtained for WT CcpI and its studied variants calculated with UB3LYP-D3BJ/6-31G(d,p).

|                    | WT    | R48A  | W51A  | W191Y | W191A | D235H | D235N | D235E | D235A | W51F/<br>W191F |
|--------------------|-------|-------|-------|-------|-------|-------|-------|-------|-------|----------------|
| $\pi_{\text{FeO}}$ | 2.11  | 2.07  | 2.07  | 2.07  | 2.07  | 2.08  | 2.08  | 2.08  | 2.08  | 0.96           |
| $\pi_{\text{His}}$ | -0.49 | 0.51  | -0.60 | -0.66 | -0.62 | --    | --    | --    | --    | -0.88          |
| $\pi_{\text{Trp}}$ | -0.45 | -0.21 | -0.41 | -0.24 | --    | --    | -0.14 | -0.55 | --    | --             |
| $\pi_{\text{por}}$ | --    | -0.29 | --    | --    | -0.36 | -0.35 | -0.34 | -0.30 | -0.38 | -0.17          |
| $\pi_{\text{W51}}$ | --    | 0.12  | --    | --    | -0.12 | -0.65 | -0.61 | -0.25 | -0.66 | --             |
